# Supplementary material for: Characteristics and Prediction of RNA Structure
Source: Biomed Res Int. 2014 Jul 6;2014:690340. doi: 10.1155/2014/690340 (PMC4109605; doi:10.1155/2014/690340)
Supplement: Supplementary file 1 — PKNOTS data set includes 116 sequences, that is 25 tRNA sequences randomly selected from Sprinzl tRNA database, HIV-1-RT-ligand RNA pseukonts, and some viral RNAs. Column len and base pair indicate the length and the number of the native base pairs of sequence. For each algorithm, the sensitivity and specificity are shown. Average is is the usual average of sensitivity and specificity values reported in the table. TT2NE data set has 47 sequences from PseudoBase and PDB. In column ex, X indicates whether the native has been found experimentally. For each algorithm, the sensitivity and specificity are shown. Column g indicates the genus of the native structure and gT, gHK, gMQ, gPK, gLZ and gGM, are the respective genii of the predictions of TT2NE, HotKnots, McQfold, ProbKnot, LZ and GM. All Mfolds prediction have genus 0, as Mfold generates only structures without pseudoknots. Average 1 is the total number of base pairs correctly predicted in the whole database divided by respectively the total number of native base pairs (average sensitivity) and the total number of base pairs predicted (average specificity). Average 2 is the usual average of sensitivity and specificity values reported in the table (values used to perform the t-test). Notice: TT2NE is shown the best value after several times folding with different parameters, so it is not the auto-computing value. [file 690340.f1.zip]

Archive with 8 entries (7 files):
- data2/
- data2/lz-im.rar
- data2/lz-tt2ne.rar
- data2/SET of PKNOTS.rar
- data2/SET of TT2NE.rar
- data2/The Detail Results of the Improved PKNOTS and LZ Algorithm.xls
- data2/The Detail Results of TT2NE Data Set.xls
- data2/TMVup.sqd
