# Supplementary material for: Characteristics and Prediction of RNA Structure
Source: Biomed Res Int. 2014 Jul 6;2014:690340. doi: 10.1155/2014/690340 (PMC4109605; doi:10.1155/2014/690340)
Supplement: Supplementary file 1 — PKNOTS data set includes 116 sequences, that is 25 tRNA sequences randomly selected from Sprinzl tRNA database, HIV-1-RT-ligand RNA pseukonts, and some viral RNAs. Column len and base pair indicate the length and the number of the native base pairs of sequence. For each algorithm, the sensitivity and specificity are shown. Average is is the usual average of sensitivity and specificity values reported in the table. TT2NE data set has 47 sequences from PseudoBase and PDB. In column ex, X indicates whether the native has been found experimentally. For each algorithm, the sensitivity and specificity are shown. Column g indicates the genus of the native structure and gT, gHK, gMQ, gPK, gLZ and gGM, are the respective genii of the predictions of TT2NE, HotKnots, McQfold, ProbKnot, LZ and GM. All Mfolds prediction have genus 0, as Mfold generates only structures without pseudoknots. Average 1 is the total number of base pairs correctly predicted in the whole database divided by respectively the total number of native base pairs (average sensitivity) and the total number of base pairs predicted (average specificity). Average 2 is the usual average of sensitivity and specificity values reported in the table (values used to perform the t-test). Notice: TT2NE is shown the best value after several times folding with different parameters, so it is not the auto-computing value. [file 690340.f1.zip › data2/The Detail Results of the Improved PKNOTS and LZ Algorithm.xls]

## Sheet: Sheet1
RNA	Len	Base	PKNOTS		PKNOTS-GM		LZ		LZ-GM
		pairs	SE	SP	SE	SP	SE	SP	SE	SP
alphamRNA	112	24	45.83	33.33	45.83	33.33	45.83	33.33	45.83	33.33
APLVcolI	83	22	72.73	69.57	45.45	45.45	72.73	69.57	45.45	45.45
BBMV1	116	38	73.68	71.79	73.68	71.79	73.68	71.79	73.68	71.79
BBMV2	114	39	76.92	76.92	76.92	76.92	76.92	76.92	76.92	76.92
BBMV34	114	39	74.36	74.36	74.36	74.36	74.36	74.36	74.36	74.36
Biotin	61	12	58.33	33.33	91.67	55	91.67	55	91.67	55
BMV1	134	44	84.09	80.43	84.09	80.43	84.09	80.43	84.09	80.43
BMV2	134	44	84.09	80.43	84.09	80.43	84.09	80.43	84.09	80.43
BMV34	134	44	84.09	80.43	84.09	80.43	84.09	80.43	84.09	80.43
CCMV1	134	45	82.22	80.43	82.22	80.43	82.22	80.43	82.22	80.43
CCMV2	134	45	82.22	80.43	82.22	80.43	82.22	80.43	84.44	82.61
CCMV34	134	45	68.89	67.39	71.11	69.57	82.22	86.05	82.22	86.05
CcTMV	84	24	100	100	70.83	77.27	100	100	70.83	77.27
CMV1	133	42	73.81	79.49	73.81	73.81	73.81	73.81	73.81	73.81
CYVV	85	24	95.83	92	95.83	92	95.83	92	95.83	92
DA0260	75	21	66.67	63.64	66.67	63.64	66.67	63.64	66.67	63.64
DA0261	75	21	66.67	63.64	66.67	63.64	66.67	63.64	66.67	63.64
DC1660	74	20	80	66.67	85	73.91	80	66.67	85	73.91
DC2720	71	20	60	52.17	60	52.17	60	52.17	60	52.17
DD3280	74	21	100	100	100	100	100	100	100	100
DF0660	74	21	57.14	50	100	95.45	57.14	50	100	95.45
DF6280	73	21	100	100	100	100	100	100	100	100
DG7740	71	21	76.19	66.67	100	95.45	76.19	66.67	100	95.45
DH5560	71	21	57.14	54.55	23.81	31.25	57.14	54.55	23.81	31.25
DI1140	77	21	57.14	50	100	87.5	57.14	50	100	100
DK6050	72	21	71.43	57.69	71.43	57.69	71.43	57.69	71.43	57.69
DL0220	87	24	100	100	87.5	77.8	100	100	100	100
DM3920	71	21	57.14	54.55	42.86	42.86	57.14	54.55	57.14	54.55
DN4000	72	21	100	91.3	100	91.3	100	91.3	100	91.3
DP1780	77	21	76.19	72.73	95.24	80	76.19	72.73	100	84
DQ5320	71	19	36.84	28	57.89	52.38	36.84	28	57.89	52.38
DR7741	73	21	100	95.45	100	95.45	100	95.45	100	95.45
DS0220	87	27	92.59	92.59	74.07	71.43	92.59	92.59	92.59	92.59
DS1141	90	25	96	96	96	96	96	96	96	96
DT5090	73	19	47.37	60	68.42	86.67	47.37	60	47.37	60
DV3200	72	11	52.38	50	100	100	52.38	50	100	100
DV4070	83	23	73.91	62.96	73.91	62.96	73.91	62.96	73.91	62.96
DW0500	74	21	57.14	46.15	57.14	46.15	57.14	46.15	57.14	46.15
DX1660	81	20	0	0	0	0	0	0	30	25
DY4840	66	19	52.63	47.62	100	86.36	52.63	47.62	100	86.36
DZ7560	87	25	44	35.48	80	35.48	44	35.48	80	66.67
EMV	80	22	72.73	61.54	72.73	61.54	72.73	61.54	72.73	61.54
HDV	87	28	85.71	75	85.71	75	85.71	75	85.71	75
HDV_anti	91	25	44	34.38	96	72.73	44	34.38	84	63.64
HIVRT_I.3-2	35	11	100	100	100	100	100	100	100	100
HIVRT_I.3-3	35	11	100	100	100	100	100	100	100	100
HIVRT_I.3-6	35	11	100	100	100	100	100	100	100	100
HIVRT_I.3-7	35	11	100	100	100	100	100	100	100	100
HIVRT_I.3-25	35	11	100	100	100	100	100	100	100	100
HIVRT_I.3-50	35	11	100	100	100	100	100	100	100	100
HIVRT_I.3-22	35	11	100	100	100	100	100	100	100	100
HIVRT_I.3-8	35	10	90	100	100	100	100	100	100	100
HIVRT_I.3-13	35	10	90	100	100	100	100	100	100	100
HIVRT_I.3-23	35	10	90	100	100	100	100	100	100	100
HIVRT_I.3-43	35	10	90	100	100	100	100	100	100	100
HIVRT_I.3-45	35	10	100	100	100	100	100	100	100	100
HIVRT_I.3-39	35	10	100	90.91	100	90.91	100	90.91	100	90.91
HIVRT_I.3-33	35	10	100	100	100	100	100	100	100	100
HIVRT_I_3_46	35	10	100	90.9	100	90.9	100	90.9	100	90.9
HIVRT_I_3_52	35	10	100	100	100	100	100	100	100	100
HIVRT_I_3_16	35	9	100	100	100	100	100	100	100	100
HIVRT_I_3_34	35	9	100	100	100	100	100	100	100	100
HIVRT_I_3_35	35	9	100	100	100	100	100	100	100	100
HIVRT_I_3_18	35	9	100	100	100	100	100	100	100	100
HIVRT_I_3_41	35	7	100	100	100	100	100	100	100	100
HIVRT_I_3_29	35	8	100	72.7	100	72.73	62.5	83.3	100	88.89
HIVRT_I_3_30	35	10	40	44.4	50	50	100	100	100	100
HIVRT_I_3_2a	35	11	100	45.5	100	54.6	100	45.5	100	45.5
HIVRT_I_3_2b	35	5	100	54.6	100	100	100	54.6	100	54.6
HIVRT_II.3-21	35	6	100	100	100	100	100	100	100	100
HIVRT_II.3-9	35	0	0	0	100	100	100	100	100	100
HIVRT_II.3-37	35	9	100	100	100	100	100	100	100	100
HIVRT_II.3-56	35	9	100	100	100	100	100	100	100	90.9
HIVRT_II.3-58	35	9	100	90	100	90	100	90	100	100
HIVRT_II.3-60	35	9	100	90.9	100	90.91	100	90.9	100	90.91
HIVRT_II.3-27	35	9	100	90.9	100	90.91	100	90.9	100	90.91
HIVRT_II.3-15	35	10	100	100	100	100	100	100	100	100
HIVRT_II.3-31	35	10	90	90	90	90	100	100	100	100
HIVRT_II.3-26	35	10	90.9	100	90.91	100	90.9	100	90.91	100
HIVRT_II.3-32	35	10	100	90	100	100	100	90	100	90
HIVRT_II.3-54	35	11	100	88.9	100	88.89	100	88.9	100	88.89
HIVRT_II.3-28	35	9	0	0	0	0	0	0	100	100
HIVRT_II.3-48	35	8	100	100	100	100	100	100	100	100
HIVRT_II.3-59	35	10	100	100	100	100	100	100	100	100
HIVRT_II.3-12	35	10	90	100	100	100	100	100	100	100
HIVRT_II.3-17	35	11	62.5	100	100	100	62.5	100	100	100
HIVRT_II.3-11	35	10	100	100	100	100	100	100	100	100
KYMV	84	23	65.2	62.5	47.83	50	65.2	62.5	47.83	50
OYMV	84	24	50	48	50	48	50	48	50	48
TMVdown	105	34	94.1	94.1	94.12	94.12	91.2	93.9	94.12	94.12
TMVup	84	25	52	68.4	52	68.42	52	68.4	84	91.3
TYMV	86	23	100	92	100	92	100	92	100	92
wyatt3	26	8	100	100	100	100	100	100	100	100
wyatt4	26	3	100	100	100	100	100	100	100	100
wyatt5	26	5	100	100	100	100	100	100	100	100
wyatt6	26	8	100	100	100	100	100	100	100	100
wyatt7	26	3	100	100	100	100	100	100	100	100
wyatt8	26	5	100	100	100	100	100	100	100	100
typeA_1.1	40	11	100	100	100	100	100	100	100	100
typeA_1.3a	40	9	100	100	100	100	100	100	100	100
typeA_2.9	34	8	62.5	55.6	62.5	55.56	62.5	55.6	62.5	55.6
typeA_2.4a	40	9	100	100	55.56	41.67	100	100	100	100
typeA_2.7a	40	8	100	66.7	100	66.67	100	66.7	100	66.67
typeA_2.11	41	8	100	100	100	100	100	100	100	100
typeA_1.7	41	6	100	75	62.5	55.56	100	75	100	75
typeA_1.17	40	9	88.9	72.7	88.89	72.73	88.9	72.7	88.9	72.7
typeB_2.1b	41	8	100	100	100	75	100	100	100	100
typeB_2.10	40	9	88.9	66.7	88.89	72.73	88.9	66.7	88.9	66.67
typeB_1.9b	41	10	90	81.8	90	81.82	90	81.8	90	81.82
typeB_2.12	38	8	100	100	100	100	100	100	100	100
typeB_1.8	41	7	100	100	100	100	100	100	100	100
typeB_1.6	38	7	100	77.8	88.9	77.78	57.1	44.4	57.14	44.4
typeC_2.3a	48	13	100	100	100	100	100	100	100	100
typeC_2.5a	41	10	40	33.3	40	33.33	40	33.3	40	33.33
typeC_2.6b	46	11	100	84.6	100	84.62	100	84.6	100	68.75
typeC_2.2b	41	6	0	0	0	0	50	33.3	50	33.3
Average SE and SP			82.8	78.9	85.5	80.8	84.8	80.7	87.7	82.8
PKNOTS data set includes 116 sequences, that is 25 tRNA sequences randomly selected from Sprinzl tRNA database, HIV-1-RT-ligand RNA pseukonts, and some viral RNAs. Column len and base pair indicate the length and the number of the native base pairs of sequence. For each algorithm, the sensitivity and specificity are shown. Average is is the usual average of sensitivity and specificity values repo…
