# Supplementary material for: Characteristics and Prediction of RNA Structure
Source: Biomed Res Int. 2014 Jul 6;2014:690340. doi: 10.1155/2014/690340 (PMC4109605; doi:10.1155/2014/690340)
Supplement: Supplementary file 1 — PKNOTS data set includes 116 sequences, that is 25 tRNA sequences randomly selected from Sprinzl tRNA database, HIV-1-RT-ligand RNA pseukonts, and some viral RNAs. Column len and base pair indicate the length and the number of the native base pairs of sequence. For each algorithm, the sensitivity and specificity are shown. Average is is the usual average of sensitivity and specificity values reported in the table. TT2NE data set has 47 sequences from PseudoBase and PDB. In column ex, X indicates whether the native has been found experimentally. For each algorithm, the sensitivity and specificity are shown. Column g indicates the genus of the native structure and gT, gHK, gMQ, gPK, gLZ and gGM, are the respective genii of the predictions of TT2NE, HotKnots, McQfold, ProbKnot, LZ and GM. All Mfolds prediction have genus 0, as Mfold generates only structures without pseudoknots. Average 1 is the total number of base pairs correctly predicted in the whole database divided by respectively the total number of native base pairs (average sensitivity) and the total number of base pairs predicted (average specificity). Average 2 is the usual average of sensitivity and specificity values reported in the table (values used to perform the t-test). Notice: TT2NE is shown the best value after several times folding with different parameters, so it is not the auto-computing value. [file 690340.f1.zip › data2/The Detail Results of TT2NE Data Set.xls]

## Sheet: Sheet1
sequence	exp	l	Mfold	Mfold	HotKnot	HotKnot	McQfold	McQfold	ProbKnot	ProbKnot	TT2NE	TT2NE	LZ	LZ	GM	GM	G	gT	gHK	gMQ	gPK	gLZ	gGM
			Sen	Spe	Sen	Spe	Sen	Spe	Sen	Spe	Sen	Spe	Sen	Spe	Sen	Spe
1u8d	X	68	69	100	69	100	69	100	69	100	88	100	76.92	100	77	100	1	1	0	0	0	0	0
1y0q	X	229	65	75	63	75	66	71	75	91	75	70	60.94	66	61	66	1	2	0	1	0	0	0
AMV3	X	113	84	86	84	86	76	81	84	80	87	85	85	81	74	74	1	1	0	0	0	1	0
BBMV		116	81	81	81	81	86	82	84	82	86	84	74.36	74.36	74	74	1	1	0	1	0	0	0
BMV3	X	138	84	86	27	66	27	70	84	80	100	97	84.09	80.43	84	80	1	1	0	0	0	0	0
Bp_PK2		91	81	96	81	96	87	87	81	81	100	100	76.67	74.19	77	74	1	1	0	1	0	0	0
Bs_glmS	X	158	42	43	44	46	76	85	76	83	65	57	36	57	51	67	2	3	0	0	0	0	1
BVDV		74	52	65	52	61	76	82	48	57	96	96	74	87	48	65	1	1	0	1	0	0	1
BWYV	X	51	55	55	100	69	55*	55	55	100	100	100	100	75	100	75	1	1	1	1	0	1	1
Bt_PrP		45	41	33	41	38	50	40	41	33	0	0	50	46.15	50	46	1	0	0	0	0	0	0
CcTMV		73	23	27	23	27	57	93	57	93	42	52	60	75	60	75	3	0	0	0	0	1	1
CGMMV		85	58	69	67	87	38	48	58	75	58	72	48.39	57.69	48	58	3	0	1	0	0	0	0
CoxB3	X	73	68	89	68	89	92	100	68	85	92	100	68	94.44	68	94	1	1	0	1	0	0	0
Ec_alpha	X	108	45	29	45	29	50	37	50	30	79	61	45.83	33.33	46	33	1	1	0	1	0	0	0
EC_PK1	X	31	0	0	100	90	100	90	30	33	100	90	100	100	100	100	1	1	1	1	1	1	1
EC_PK4	X	52	0	0	68	100	52	71	68	100	100	100	100	100	100	100	1	1	0	0	0	1	1
EC_RpmI	X	72	68	90	20	26	51	71	79	100	58	60	50	71.43	50	71	1	1	1	0	0	0	0
EC_S15	X	67	58	62	100	73	58*	62	58	55	100	73	59	63	100	74	1	1	1	0	0	0	1
GLRaV 3		75	65	59	65	59	100	76	65	56	100	76	100	76.92	100	77	1	1	0	1	0	1	1
GLV_IRES	X	78	21	22	100	85	30	30	39	36	100	85	78.26	81.82	78	82	1	2	2	0	1	1	1
HAV	X	55	58	83	58	83	58	83	58	83	58*	83	58.82	83.3	59	83	1	0	0	0	0	0	0
HCV_229EI	X	74	79	100	79	100	100	100	79	95	100	100	50	63.16	50	63	1	1	0	1	0	0	0
HDV	X	87	65	70	41*	44	75	75	79	85	93	84	86.71	75	87	75	2	2	0	1	0	2	2
HDV_antigenomic		91	16	14	16*	14	100	80	41	38	72	58	44	34	84	64	2	2	0	1	1	1	2
Hs_PrP		45	0	0	0	0	54	42	0	0	0	0	45.45	33.33	45	33	1	0	0	0	0	0	0
Hs_Ma3	X	61	68	61	68	68	100	100	68	73	100	100	68.75	64.71	69	65	1	1	0	1	0	0	0
hTER	X	121	21	31	32	33	16	16	25	26	0	0	23.33	21.88	23	22	1	1	0	0	0	0	0
IBV	X	56	55	66	100	100	94	100	55	62	94	100	50	52.94	50	53	1	1	1	1	0	1	1
Lp_PK1		31	50	100	50*	100	50	100	50	71	50*	100	90	90	90	90	1	0	0	0	0	1	1
Mengo_PKC		26	37	60	0	0	37	60	0	0	100	100	0	0	0	0	1	1	0	0	0	0	0
minimalIBV	X	45	64	91	100	94	100	94	64	68	100	94	94.12	94.12	94	94	1	1	1	1	0	1	1
Mm_Edr	X	45	64	91	100	94	100	94	64	68	100	94	100	86.36	100	86	1	1	1	1	0	1	1
MMTV	X	34	0	0	100	91	100	91	0	0	100	91	100	91.67	100	92	1	1	1	1	0	1	1
Mo_MuLV	X	62	0	0	53	42	100	78	0	0	93	66	100	68.18	100	68	1	1	1	1	0	1	1
pKA A	X	36	50	66	100	92	100	92	50	85	100	92	100	92.31	100	92	1	1	1	1	0	1	1
PSIV_IRES	X	203	72	68	29	68	31	100	72	68	75	75	65.52	60.32	66	60	3	1	0	0	0	0	0
R2_retro_PK	X	76	62	62	87	77	25	26	41	45	66	59	62.5	62.5	63	63	1	2	1	1	0	0	0
RSV	X	128	74	76	97	82	100	95	76	78	94	88	87.18	87.18	87	87	1	1	1	1	0	1	1
satRPV	X	73	59	68	59	68	81	81	59	65	81	81	77.27	77.27	77	77	1	1	0	1	0	1	1
SRV 1	X	38	0	0	100	100	100	100	0	0	100	100	100	100	100	100	1	1	1	1	0	1	1
TEV	X	94	21	31	21	31	28	53	32	60	28	47	71.43	76.92	71	77	3	0	0	0	0	2	2
T2_gene32	X	33	58	70	100	100	100	100	58	70	100	100	100	100	100	100	1	1	1	1	0	1	1
T4_gene32	X	28	63	87	63*	87	63	100	63	100	100	100	100	100	100	100	1	1	0	0	0	1	1
TMV	X	74	52	65	52	61	52	65	56	60	48	54	85	100	85	100	3	1	0	0	0	2	2
Tt LSU	X	65	60	75	95	100	60	100	60	80	95	100	55	61.11	55	61	1	1	1	0	0	0	0
TYMV	X	74	72	78	70	73	72	78	72	78	72	69	100	92	100	92	1	1	0	0	0	1	1
VMV	X	69	50	41	50	41	100	60	50	35	100	70	100	58	100	76	1	1	0	1	0	1	1
Average1			55	60	60	67	66	75	60	64	78	76	70	71	72	72	60	47	18	25	3	28	31
Average2			50	58	63	67	68	77	54	63	81	80	73	73	75	74
TT2NE data set has 47 sequences from PseudoBase and PDB. In column ex, X indicates whether the native has been found experimentally. For each algorithm, the sensitivity and specificity are shown. Column g indicates the genus of the native structure and gT, gHK, gMQ, gPK, gLZ and gGM, are the respective genii of the predictions of TT2NE, HotKnots, McQfold, ProbKnot, LZ and GM. All Mfolds predictio…
