# Supplementary material for: Characteristics and Prediction of RNA Structure
Source: Biomed Res Int. 2014 Jul 6;2014:690340. doi: 10.1155/2014/690340 (PMC4109605; doi:10.1155/2014/690340)
Supplement: Supplementary file 1 — PKNOTS data set includes 116 sequences, that is 25 tRNA sequences randomly selected from Sprinzl tRNA database, HIV-1-RT-ligand RNA pseukonts, and some viral RNAs. Column len and base pair indicate the length and the number of the native base pairs of sequence. For each algorithm, the sensitivity and specificity are shown. Average is is the usual average of sensitivity and specificity values reported in the table. TT2NE data set has 47 sequences from PseudoBase and PDB. In column ex, X indicates whether the native has been found experimentally. For each algorithm, the sensitivity and specificity are shown. Column g indicates the genus of the native structure and gT, gHK, gMQ, gPK, gLZ and gGM, are the respective genii of the predictions of TT2NE, HotKnots, McQfold, ProbKnot, LZ and GM. All Mfolds prediction have genus 0, as Mfold generates only structures without pseudoknots. Average 1 is the total number of base pairs correctly predicted in the whole database divided by respectively the total number of native base pairs (average sensitivity) and the total number of base pairs predicted (average specificity). Average 2 is the usual average of sensitivity and specificity values reported in the table (values used to perform the t-test). Notice: TT2NE is shown the best value after several times folding with different parameters, so it is not the auto-computing value. [file 690340.f1.zip › data2/TMVup.sqd]

	             SS  ............>>>.AAAA<<<.....aaaaBBB.>>>>>>bbb...<<
	          TMVup  AUAAUAAAUAACGGAUUGUGUCCGUAAUCACACGUGGUGCGUACGAUAAC

	             SS  <<<<CCCC.....>>>>>cccc......<.<<<<
	          TMVup  GCAUAGUGUUUUUCCCUCCACUUAAAUCGAAGGG

---------------------------------------------------
---------------------------------------------------
50 50 25 24  
tracing WX 13100 
 (W5) SL, trace wx  50 49 13100
---------------------------------------------------
50 49 24 24  
tracing WX 13100 
 (W5) SL, trace wx  50 48 13100
---------------------------------------------------
50 48 24 23  
tracing WX 13100 
 (W5) SL, trace wx  50 47 13100
---------------------------------------------------
50 47 23 23  
tracing WX 13100 
 (W5) SL, trace wx  50 46 13100
---------------------------------------------------
50 46 23 22  
tracing WX 13100 
 (W5) SL, trace wx  50 45 13100
---------------------------------------------------
50 45 22 22  
tracing WX 13100 
 (W5) SL, trace wx  50 44 13100
---------------------------------------------------
50 44 22 21  
tracing WX 13100 
 (W5) SL, trace wx  50 43 13100
---------------------------------------------------
50 43 21 21  
tracing WX 13100 
 (W5) SL, trace wx  50 42 13100
---------------------------------------------------
50 42 21 20  
tracing WX 13100 
 (W5) SL, trace wx  50 41 13100
---------------------------------------------------
50 41 20 20  
tracing WX 13100 
 (W7) trace wx  27 18 6700
 (W7) trace wx  50 22 6400
---------------------------------------------------
50 22 11 10  
tracing WX 6400 
 (W8.1) trace vx 38 10 1600
 (W8.1) trace vx 50 11 400
---------------------------------------------------
50 11 5 5  
tracing VX  400   
 (v2) IS2 (1,1) 2000
 trace vx 49 9 -1600
---------------------------------------------------
49 9 4 4  
tracing VX  -1600   
 (v2) IS2 (1,1) 2100
 trace vx 48 7 -3700
---------------------------------------------------
48 7 3 3  
tracing VX  -3700   
 (v1) hairpin 7, -3700 
---------------------------------------------------
38 10 5 4  
tracing VX  1600   
 (v2) IS2 (1,1) 1800
 trace vx 37 8 -200
---------------------------------------------------
37 8 4 3  
tracing VX  -200   
 (v2) IS2 (1,1) 2100
 trace vx 36 6 -2300
---------------------------------------------------
36 6 3 2  
tracing VX  -2300   
 (v1) hairpin 6, -2300 
---------------------------------------------------
27 18 9 8  
tracing WX 6700 
 (W6) SR, trace wx 26 17 6700
---------------------------------------------------
26 17 8 8  
tracing WX 6700 
 (W6) SR, trace wx 25 16 6700
---------------------------------------------------
25 16 8 7  
tracing WX 6700 
 (W2) SR SL, trace vx 24 14 5700
---------------------------------------------------
24 14 7 6  
tracing VX  5700   
 (v2) IS2 (1,1) 2100
 trace vx 23 12 3600
---------------------------------------------------
23 12 6 5  
tracing VX  3600   
 (v2) IS2 (1,1) 2000
 trace vx 22 10 1600
---------------------------------------------------
22 10 5 4  
tracing VX  1600   
 (v2) IS2 (1,1) 2900
 trace vx 21 8 -1300
---------------------------------------------------
21 8 4 3  
tracing VX  -1300   
 (v2) IS2 (1,1) 2300
 trace vx 20 6 -3600
---------------------------------------------------
20 6 3 2  
tracing VX  -3600   
 (v1) hairpin 6, -3600 
 iteration1: nHelix1=1
  10-  14 :   20-  24      5
Selected:
  10-  14 :   20-  24      5
---------------------------------------------------
---------------------------------------------------
83 83 41 41  
tracing WX 19400 
 (W5) SL, trace wx  83 82 19400
---------------------------------------------------
83 82 41 40  
tracing WX 19400 
 (W5) SL, trace wx  83 81 19400
---------------------------------------------------
83 81 40 40  
tracing WX 19400 
 (W5) SL, trace wx  83 80 19400
---------------------------------------------------
83 80 40 39  
tracing WX 19400 
 (W5) SL, trace wx  83 79 19400
---------------------------------------------------
83 79 39 39  
tracing WX 19400 
 (W5) SL, trace wx  83 78 19400
---------------------------------------------------
83 78 39 38  
tracing WX 19400 
 (W5) SL, trace wx  83 77 19400
---------------------------------------------------
83 77 38 38  
tracing WX 19400 
 (W5) SL, trace wx  83 76 19400
---------------------------------------------------
83 76 38 37  
tracing WX 19400 
 (W5) SL, trace wx  83 75 19400
---------------------------------------------------
83 75 37 37  
tracing WX 19400 
 (W5) SL, trace wx  83 74 19400
---------------------------------------------------
83 74 37 36  
tracing WX 19400 
 (W7) trace wx  61 52 16700
 (W7) trace wx  83 21 2700
---------------------------------------------------
83 21 10 10  
tracing WX 2700 
 (W3) SL, trace vx  83 20 2600
---------------------------------------------------
83 20 10 9  
tracing VX  2600   
 (v2) IS2 (1,1) 2900
 trace vx 82 18 -300
---------------------------------------------------
82 18 9 8  
tracing VX  -300   
 (v2) IS2 (1,1) 2900
 trace vx 81 16 -3200
---------------------------------------------------
81 16 8 7  
tracing VX  -3200   
 (v2) IS2 (1,1) 1700
 trace vx 80 14 -4900
---------------------------------------------------
80 14 7 6  
tracing VX  -4900   
 (v1) hairpin 14, -4900 
---------------------------------------------------
61 52 26 25  
tracing WX 16700 
 (W6) SR, trace wx 60 51 16700
---------------------------------------------------
60 51 25 25  
tracing WX 16700 
 (W6) SR, trace wx 59 50 16700
---------------------------------------------------
59 50 25 24  
tracing WX 16700 
 (W7) trace wx  27 18 6700
 (W7) trace wx  59 31 10000
---------------------------------------------------
59 31 15 15  
tracing WX 10000 
 (W2) SR SL, trace vx 58 29 9600
---------------------------------------------------
58 29 14 14  
tracing VX  9600   
 (v2) IS2 (1,1) 2100
 trace vx 57 27 7500
---------------------------------------------------
57 27 13 13  
tracing VX  7500   
 (v2) IS2 (1,1) 1800
 trace vx 56 25 5700
---------------------------------------------------
56 25 12 12  
tracing VX  5700   
 (v2) IS2 (1,1) 2100
 trace vx 55 23 3600
---------------------------------------------------
55 23 11 11  
tracing VX  3600   
 (v2) IS2 (4,2) -3000
 trace vx 53 17 6600
---------------------------------------------------
53 17 8 8  
tracing VX  6600   
 (v2) IS2 (1,1) 1000
 trace vx 52 15 5600
---------------------------------------------------
52 15 7 7  
tracing VX  5600   
 (v2) IS2 (1,1) 1800
 trace vx 51 13 3800
---------------------------------------------------
51 13 6 6  
tracing VX  3800   
 (v2) IS2 (1,1) 3400
 trace vx 50 11 400
---------------------------------------------------
50 11 5 5  
tracing VX  400   
 (v2) IS2 (1,1) 2000
 trace vx 49 9 -1600
---------------------------------------------------
49 9 4 4  
tracing VX  -1600   
 (v2) IS2 (1,1) 2100
 trace vx 48 7 -3700
---------------------------------------------------
48 7 3 3  
tracing VX  -3700   
 (v1) hairpin 7, -3700 
---------------------------------------------------
27 18 9 8  
tracing WX 6700 
 (W6) SR, trace wx 26 17 6700
---------------------------------------------------
26 17 8 8  
tracing WX 6700 
 (W6) SR, trace wx 25 16 6700
---------------------------------------------------
25 16 8 7  
tracing WX 6700 
 (W2) SR SL, trace vx 24 14 5700
---------------------------------------------------
24 14 7 6  
tracing VX  5700   
 (v2) IS2 (1,1) 2100
 trace vx 23 12 3600
---------------------------------------------------
23 12 6 5  
tracing VX  3600   
 (v2) IS2 (1,1) 2000
 trace vx 22 10 1600
---------------------------------------------------
22 10 5 4  
tracing VX  1600   
 (v2) IS2 (1,1) 2900
 trace vx 21 8 -1300
---------------------------------------------------
21 8 4 3  
tracing VX  -1300   
 (v2) IS2 (1,1) 2300
 trace vx 20 6 -3600
---------------------------------------------------
20 6 3 2  
tracing VX  -3600   
 (v1) hairpin 6, -3600 
 iteration2: nHelix1=2
  36-  41 :   48-  53      6
  10-  14 :   20-  24      5
Selected:
  36-  41 :   48-  53      6
---------------------------------------------------
83 83 41 41  
tracing WX 20578 
 (W5) SL, trace wx  83 82 20578
---------------------------------------------------
83 82 41 40  
tracing WX 20578 
 (W5) SL, trace wx  83 81 20578
---------------------------------------------------
83 81 40 40  
tracing WX 20578 
 (W5) SL, trace wx  83 80 20578
---------------------------------------------------
83 80 40 39  
tracing WX 20578 
 (W5) SL, trace wx  83 79 20578
---------------------------------------------------
83 79 39 39  
tracing WX 20578 
 (W5) SL, trace wx  83 78 20578
---------------------------------------------------
83 78 39 38  
tracing WX 20578 
 (W5) SL, trace wx  83 77 20578
---------------------------------------------------
83 77 38 38  
tracing WX 20578 
 (W5) SL, trace wx  83 76 20578
---------------------------------------------------
83 76 38 37  
tracing WX 20578 
 (W5) SL, trace wx  83 75 20578
---------------------------------------------------
83 75 37 37  
tracing WX 20578 
 (W5) SL, trace wx  83 74 20578
---------------------------------------------------
83 74 37 36  
tracing WX 20578 
 (W7) trace wx  35 26 8187
 (W7) trace wx  83 47 12391
---------------------------------------------------
83 47 23 23  
tracing WX 12391 
 (W10.1) trace yhxr 77 41 21 11376
 (W10.1) trace yhxl 83 24 3 5425
 (W10.1) trace wbx 67 0 -9999999
---------------------------------------------------
83 24 7 3  
tracing YHX 5425 
 (YHL5) SLE, trace yhx 83 23 3 5625 
---------------------------------------------------
83 23 6 3  
tracing YHX 5625 
 (YHL5) SLE, trace yhx 83 22 3 5825 
---------------------------------------------------
83 22 5 3  
tracing YHX 5825 
 (YHL5) SLE, trace yhx 83 21 3 6025 
---------------------------------------------------
83 21 4 3  
tracing YHX 6025 
 (YHL3) SLE, trace vhx 83 20 3 6225 
---------------------------------------------------
83 20 3 3  
tracing VHX  6225 
 (stem1) (83,20) 
 (stem1) (83,20) 3 3 6225 
---------------------------------------------------
82 18 2 2  
tracing VHX  3818 
 (stem1) (82,18) 
 (stem1) (82,18) 2 2 3818 
---------------------------------------------------
81 16 1 1  
tracing VHX  1411 
 (stem1) (81,16) 
 (stem1) (81,16) 1 1 1411 
---------------------------------------------------
80 14 0 0  
---------------------------------------------------
77 41 21 9  
tracing YHX 11376 
 (YHR6) SRE, trace yhx 76 40 21 11576  
---------------------------------------------------
76 40 21 8  
tracing YHX 11576 
 (YHR6) SRE, trace yhx 75 39 21 11776  
---------------------------------------------------
75 39 21 7  
tracing YHX 11776 
 (YHR6) SRE, trace yhx 74 38 21 11976  
---------------------------------------------------
74 38 21 6  
tracing YHX 11976 
 (YHR6) SRE, trace yhx 73 37 21 12176  
---------------------------------------------------
73 37 21 5  
tracing YHX 12176 
 (YHR6) SRE, trace yhx 72 36 21 12376  
---------------------------------------------------
72 36 21 4  
tracing YHX 12376 
 (YHR6) SRE, trace yhx 71 35 21 12576  
---------------------------------------------------
71 35 21 3  
tracing YHX 12576 
 (YHR8.1) EL, trace vx  53 17 6600 
 (YHR8.1) EL, trace vhx 71 17 3 4648 
---------------------------------------------------
53 17 8 8  
tracing VX  6600   
 (v2) IS2 (1,1) 1000
 trace vx 52 15 5600
---------------------------------------------------
52 15 7 7  
tracing VX  5600   
 (v2) IS2 (1,1) 1800
 trace vx 51 13 3800
---------------------------------------------------
51 13 6 6  
tracing VX  3800   
 (v2) IS2 (1,1) 3400
 trace vx 50 11 400
---------------------------------------------------
50 11 5 5  
tracing VX  400   
 (v2) IS2 (1,1) 2000
 trace vx 49 9 -1600
---------------------------------------------------
49 9 4 4  
tracing VX  -1600   
 (v2) IS2 (1,1) 2100
 trace vx 48 7 -3700
---------------------------------------------------
48 7 3 3  
tracing VX  -3700   
 (v1) hairpin 7, -3700 
---------------------------------------------------
71 17 3 3  
tracing VHXR   4648 
 (stem1) (71,17) 
 (stem1) (71,17) 3 3 4648 
---------------------------------------------------
70 15 2 2  
tracing VHXR   3237 
 (stem1) (70,15) 
 (stem1) (70,15) 2 2 3237 
---------------------------------------------------
69 13 1 1  
tracing VHXR   1494 
 (stem1) (69,13) 
 (stem1) (69,13) 1 1 1494 
---------------------------------------------------
68 11 0 0  
---------------------------------------------------
35 26 13 12  
tracing WX 8187 
 (W6) SR, trace wx 34 25 8187
---------------------------------------------------
34 25 12 12  
tracing WX 8187 
 (W6) SR, trace wx 33 24 8187
---------------------------------------------------
33 24 12 11  
tracing WX 8187 
 (W6) SR, trace wx 32 23 8187
---------------------------------------------------
32 23 11 11  
tracing WX 8187 
 (W10.1) trace yhxr 25 16 5 8066
 (W10.1) trace yhxl 32 16 4 4863
 (W10.1) trace wbx 19 -1 -2000
---------------------------------------------------
32 16 3 4  
tracing YHX 4863 
 (YHL4) SRE, trace vhx 31 15 3 4731 
---------------------------------------------------
31 15 3 3  
tracing VHX  4731 
 (stem1) (31,15) 
 (stem1) (31,15) 3 3 4731 
---------------------------------------------------
30 13 2 2  
tracing VHX  3237 
 (stem1) (30,13) 
 (stem1) (30,13) 2 2 3237 
---------------------------------------------------
29 11 1 1  
tracing VHX  1494 
 (stem1) (29,11) 
 (stem1) (29,11) 1 1 1494 
---------------------------------------------------
28 9 0 0  
---------------------------------------------------
25 16 5 5  
tracing YHX 8066 
 (YHR2) SLE, SRE, trace vhx 24 14 4 7719 
---------------------------------------------------
24 14 4 4  
tracing VHXR   7719 
 (VHR2) trace vhx 24 14 1 1743 
 (VHR2) trace vhx 23 12 3 5976 
---------------------------------------------------
23 12 3 3  
tracing VHXR   5976 
 (VHR2) trace vhx 23 12 1 1660 
 (VHR2) trace vhx 22 10 2 4316 
---------------------------------------------------
22 10 2 2  
tracing VHXR   4316 
 (VHR2) trace vhx 22 10 1 2407 
 (VHR2) trace vhx 21 8 1 1909 
---------------------------------------------------
21 8 1 1  
tracing VHXR   1909 
 (VHR1) IS2 (1,1) 21 8 1909 
---------------------------------------------------
22 10 1 1  
tracing VHXR   2407 
 (VHR1) IS2 (1,1) 22 10 2407 
---------------------------------------------------
23 12 1 1  
tracing VHXR   1660 
 (VHR1) IS2 (1,1) 23 12 1660 
---------------------------------------------------
24 14 1 1  
tracing VHXR   1743 
 (VHR1) IS2 (1,1) 24 14 1743 
NAM  TMVup
SRC  TMVup - 0..83::84
SEQ  +SS
       1 A   U   A   A   U   A   A   A   U   A   A   C   G   G   A   U   U   G   U   G
         0   1   2   3   4   5   6   7   8   9   10  11  12  13  14  15  16  17  18  19  
         .   .   .   .   .   .   .   .   .   .   24  23  22  21  20  .   31  30  29  28  

      21 U   C   C   G   U   A   A   U   C   A   C   A   C   G   U   G   G   U   G   C
         20  21  22  23  24  25  26  27  28  29  30  31  32  33  34  35  36  37  38  39  
         14  13  12  11  10  .   .   .   19  18  17  16  .   .   .   .   53  52  51  50  

      41 G   U   A   C   G   A   U   A   A   C   G   C   A   U   A   G   U   G   U   U
         40  41  42  43  44  45  46  47  48  49  50  51  52  53  54  55  56  57  58  59  
         49  48  .   .   .   .   .   .   41  40  39  38  37  36  71  70  69  68  .   .   

      61 U   U   U   C   C   C   U   C   C   A   C   U   U   A   A   A   U   C   G   A
         60  61  62  63  64  65  66  67  68  69  70  71  72  73  74  75  76  77  78  79  
         .   .   .   83  82  81  80  .   57  56  55  54  .   .   .   .   .   .   .   .   

      81 A   G   G   G
         80  81  82  83  
         66  65  64  63  

true pairs 25.0	 found pairs 23.0	 agree 21.0 (sen=84.00 spe=91.30 -- C_ap = 87.58)
----------------------------------------------------------------------
   Log odds score:       20578 
energy (kcal/mol):      -20.58 
number of pairs found:      23.00 
number of pairs annotated:  25.00 
----------------------------------------------------------------------
Allow pseudoknots? YES
----------------------------------------------------------------------
Parameters (energy units, kcal/mol)
 wkn  parameter:          0.83 (pseudoknots weight)
 P1   parameter:          0.00 
 P2   parameter:          0.00 
 P3   parameter:          3.00 
 P4   parameter:          0.00 
 P5   parameter:          4.10 
 P5P  parameter:          8.43 
 P6   parameter:          0.40 
 P6P  parameter:          0.24 
 P10  parameter:          0.10 
 P10P parameter:          0.10 
 P11  parameter:          6.30 
 P12  parameter:          6.00 
 P13  parameter:         16.00 
 full pseudoknot model.
----------------------------------------------------------------------

 ct_output 
----------------------------------------------------------------------
    1 A       0    2    0    1
    2 U       1    3    0    2
    3 A       2    4    0    3
    4 A       3    5    0    4
    5 U       4    6    0    5
    6 A       5    7    0    6
    7 A       6    8    0    7
    8 A       7    9    0    8
    9 U       8   10    0    9
   10 A       9   11    0   10
   11 A      10   12   25   11
   12 C      11   13   24   12
   13 G      12   14   23   13
   14 G      13   15   22   14
   15 A      14   16   21   15
   16 U      15   17    0   16
   17 U      16   18   32   17
   18 G      17   19   31   18
   19 U      18   20   30   19
   20 G      19   21   29   20
   21 U      20   22   15   21
   22 C      21   23   14   22
   23 C      22   24   13   23
   24 G      23   25   12   24
   25 U      24   26   11   25
   26 A      25   27    0   26
   27 A      26   28    0   27
   28 U      27   29    0   28
   29 C      28   30   20   29
   30 A      29   31   19   30
   31 C      30   32   18   31
   32 A      31   33   17   32
   33 C      32   34    0   33
   34 G      33   35    0   34
   35 U      34   36    0   35
   36 G      35   37    0   36
   37 G      36   38   54   37
   38 U      37   39   53   38
   39 G      38   40   52   39
   40 C      39   41   51   40
   41 G      40   42   50   41
   42 U      41   43   49   42
   43 A      42   44    0   43
   44 C      43   45    0   44
   45 G      44   46    0   45
   46 A      45   47    0   46
   47 U      46   48    0   47
   48 A      47   49    0   48
   49 A      48   50   42   49
   50 C      49   51   41   50
   51 G      50   52   40   51
   52 C      51   53   39   52
   53 A      52   54   38   53
   54 U      53   55   37   54
   55 A      54   56   72   55
   56 G      55   57   71   56
   57 U      56   58   70   57
   58 G      57   59   69   58
   59 U      58   60    0   59
   60 U      59   61    0   60
   61 U      60   62    0   61
   62 U      61   63    0   62
   63 U      62   64    0   63
   64 C      63   65   84   64
   65 C      64   66   83   65
   66 C      65   67   82   66
   67 U      66   68   81   67
   68 C      67   69    0   68
   69 C      68   70   58   69
   70 A      69   71   57   70
   71 C      70   72   56   71
   72 U      71   73   55   72
   73 U      72   74    0   73
   74 A      73   75    0   74
   75 A      74   76    0   75
   76 A      75   77    0   76
   77 U      76   78    0   77
   78 C      77   79    0   78
   79 G      78   80    0   79
   80 A      79   81    0   80
   81 A      80   82   67   81
   82 G      81   83   66   82
   83 G      82   84   65   83
   84 G      83   85   64   84
